# Supplementary material
Source: PubMed Central journal article supplement (PMC3859870)
Supplement: NIHMS441584-supplement-01.pdf [file NIHMS441584-supplement-01.pdf]

553 Online Table. Demographic distribution of health plan enrollees during 2004. Each column represents  
554 data from a single health plan. N reflects the number of exams, and percent of exams by sex, and within  
555 age strata.

---

**Online Table.** Demographic distribution of health plan enrollees during 2004. Each column represents data from a single health plan. N reflects the number of exams, and percent of exams by sex, and within age strata.

|                          |       | A       |       | B       |       | C       |       | D       |       | E       |       | F       |       | TOTAL          |              |
|--------------------------|-------|---------|-------|---------|-------|---------|-------|---------|-------|---------|-------|---------|-------|----------------|--------------|
| <b>Enrollees</b>         |       | 497,715 |       | 417,409 |       | 210,453 |       | 247,287 |       | 389,313 |       | 140,363 |       | 1,902,546      |              |
|                          |       | N       | (%)   | N              | (%)          |
| <b>Sex (Female)</b>      |       | 266,155 | (53%) | 217,172 | (52%) | 107,243 | (51%) | 130,041 | (53%) | 204,047 | (52%) | 73,301  | (52%) | <b>997,959</b> | <b>(52%)</b> |
| <b>Age</b>               | 0-14  | 81,456  | (16%) | 73,809  | (18%) | 40,804  | (19%) | 49,884  | (20%) | 69,296  | (18%) | 28,718  | (20%) | <b>343,968</b> | <b>(18%)</b> |
|                          | 15-24 | 64,380  | (13%) | 52,774  | (13%) | 25,291  | (12%) | 32,837  | (13%) | 45,873  | (12%) | 19,723  | (14%) | <b>240,879</b> | <b>(13%)</b> |
|                          | 25-34 | 46,448  | (9%)  | 47,599  | (11%) | 24,866  | (12%) | 33,001  | (13%) | 43,559  | (11%) | 15,534  | (11%) | <b>211,008</b> | <b>(11%)</b> |
|                          | 35-44 | 68,342  | (14%) | 59,426  | (14%) | 31,558  | (15%) | 46,860  | (19%) | 56,982  | (15%) | 19,083  | (14%) | <b>282,252</b> | <b>(15%)</b> |
|                          | 45-54 | 91,979  | (18%) | 69,498  | (17%) | 34,205  | (16%) | 42,754  | (17%) | 65,036  | (17%) | 19,951  | (14%) | <b>323,424</b> | <b>(17%)</b> |
|                          | 55-64 | 74,101  | (15%) | 58,105  | (14%) | 27,046  | (13%) | 25,145  | (10%) | 48,374  | (12%) | 13,433  | (10%) | <b>246,205</b> | <b>(13%)</b> |
|                          | 65-74 | 35,419  | (7%)  | 30,423  | (7%)  | 13,914  | (7%)  | 11,405  | (5%)  | 33,879  | (9%)  | 10,441  | (7%)  | <b>135,481</b> | <b>(7%)</b>  |
|                          | 75-84 | 25,860  | (5%)  | 18,660  | (4%)  | 9,412   | (4%)  | 4,379   | (2%)  | 20,546  | (5%)  | 9,003   | (6%)  | <b>87,860</b>  | <b>(5%)</b>  |
|                          | 85+   | 9,730   | (2%)  | 7,115   | (2%)  | 3,357   | (2%)  | 1,022   | (0%)  | 5,768   | (1%)  | 4,477   | (3%)  | <b>31,469</b>  | <b>(2%)</b>  |
| <b>Underwent Imaging</b> |       | 213,566 | (43%) | 170,094 | (41%) | 82,428  | (39%) | 100,206 | (41%) | 149,919 | (39%) | 51,114  | (36%) | <b>767,329</b> | <b>(40%)</b> |
